# Supplementary material for: Afternoon Nap and Bright Light Exposure Improve Cognitive Flexibility Post Lunch
Source: PLoS One. 2015 May 27;10(5):e0125359. doi: 10.1371/journal.pone.0125359 (PMC4446306; doi:10.1371/journal.pone.0125359)
Supplement: S1 Dataset — (XLSX) [file pone.0125359.s001.xlsx]

## Sheet: Raw data
Sujets	Groupe	Controle1TPCNSRC	Controle1TPCSWRC	Controle1TPCSCRC	Controle1TPLNSRC	Controle1TPLSWRC	Controle1TPLSCRC	CTL1NSRC	CTL1SWRC	CTL1SCRC	Controle2TPCNSRC	Controle2TPCSWRC	Controle2TPCSCRC	Controle2TPLNSRC	Controle2TPLSWRC	Controle2TPLSCRC	CTL2NSRC	CTL2SWRC	CTL2SCRC	Controle3TPCNSRC	Controle3TPCSWRC	Controle3TPCSCRC	Controle3TPLNSRC	Controle3TPLSWRC	Controle3TPLSCRC	CTL3NSRC	CTL3SWRC	CTL3SCRC	Manip1TPCNSRC	Manip1TPCSWRC	Manip1TPCSCRC	Manip1TPLNSRC	Manip1TPLSWRC	Manip1TPLSCRC	MANIP1NSRC	MANIP1SWRC	MANIP1SCRC	Manip2TPCNSRC	Manip2TPCSWRC	Manip2TPCSCRC	Manip2TPLNSRC	Manip2TPLSWRC	Manip2TPLSCRC	MANIP2NSRC	MANIP2SWRC	MANIP2SCRC	Manip3TPCNSRC	Manip3TPCSWRC	Manip3TPCSCRC
1	1	0.946237	0.978261	-0.0320243	0.966667	0.957895	0.00877193	0.956452	0.968078	-0.0116262	0.9125	0.842697	0.0698034	0.960526	0.813187	0.14734	0.936513	0.827942	0.108571	0.897727	0.94382	-0.046093	0.965116	0.913043	0.0520728	0.931422	0.928432	0.00298992	0.954023	0.913043	0.0409795	0.94186	0.924731	0.0171293	0.947942	0.918887	0.0290544	0.923913	0.942529	-0.0186157	0.883117	0.846154	0.036963	0.903515	0.894341	0.00917367	0.91954	0.910112	0.00942787
2	1	0.967033	0.946237	0.0207964	0.978022	0.946809	0.0312135	0.972527	0.946523	0.0260049	0.989247	0.989691	-0.00044341	1	0.989474	0.0105263	0.994624	0.989582	0.00504145	0.989474	1	-0.0105263	0.967391	0.978947	-0.0115561	0.978432	0.989474	-0.0110412	0.94382	0.934783	0.00903762	0.955556	0.945652	0.00990338	0.949688	0.940217	0.0094705	0.956044	0.978495	-0.0224507	0.94382	0.934783	0.00903762	0.949932	0.956639	-0.00670653	0.967033	0.946237	0.0207964
3	1	0.842105	0.891304	-0.0491991	0.875	0.817073	0.0579268	0.858553	0.854189	0.00436387	0.869048	0.8375	0.0315476	0.8	0.705882	0.0941176	0.834524	0.771691	0.0628326	0.859155	0.836957	0.0221984	0.891892	0.730769	0.161123	0.875523	0.783863	0.0916605	0.94186	0.813953	0.127907	0.849315	0.790698	0.0586174	0.895588	0.802326	0.0932622	0.911392	0.857143	0.0542495	0.820513	0.8	0.0205128	0.865953	0.828571	0.0373812	0.886076	0.783133	0.102943
4	1	0.978495	0.978947	-0.000452745	0.967742	0.978723	-0.0109815	0.973118	0.978835	-0.00571711	0.967742	0.989474	-0.0217317	0.978261	0.968421	0.00983982	0.973001	0.978947	-0.00594597	0.989011	0.969072	0.0199388	0.978261	0.946237	0.0320243	0.983636	0.957654	0.0259816	0.953488	0.98	-0.0265116	0.853333	0.793651	0.0596825	0.903411	0.886825	0.0165855	0.959184	0.988764	-0.0295804	0.965517	0.990099	-0.0245818	0.96235	0.989432	-0.0270811	0.954545	0.989899	-0.0353535
5	1	0.894118	0.886364	0.00775401	0.858824	0.917647	-0.0588235	0.876471	0.902005	-0.0255348	0.902439	0.902174	0.000265111	0.882353	0.894118	-0.0117647	0.892396	0.898146	-0.0057498	0.897727	0.921348	-0.023621	0.869048	0.870588	-0.00154062	0.883387	0.895968	-0.0125808	0.978261	0.978947	-0.000686499	0.91954	0.934066	-0.0145257	0.948901	0.956507	-0.0076061	0.966292	0.947368	0.0189237	0.966292	0.923913	0.0423791	0.966292	0.935641	0.0306514	0.91954	0.933333	-0.0137931
6	1	1	0.912088	0.0879121	0.955056	0.989796	-0.0347397	0.977528	0.950942	0.0265862	0.953488	0.98	-0.0265116	0.978723	0.909091	0.0696325	0.966106	0.944545	0.0215604	0.969697	0.977528	-0.00783112	0.952941	0.927083	0.0258578	0.961319	0.952306	0.00901336	0.988764	1	-0.011236	0.99	0.988889	0.00111111	0.989382	0.994444	-0.00506242	0.989796	0.98913	0.000665484	1	0.990196	0.00980392	0.994898	0.989663	0.0052347	0.977273	0.990099	-0.0128263
7	1	0.956989	0.944444	0.0125448	0.939759	0.936842	0.00291693	0.948374	0.940643	0.00773087	0.962025	0.888889	0.0731364	0.925532	0.928571	-0.00303951	0.943779	0.90873	0.0350485	0.929412	0.875	0.0544118	0.91358	0.89011	0.0234704	0.921496	0.882555	0.0389411	0.928571	0.912088	0.0164835	0.967742	0.908046	0.059696	0.948157	0.910067	0.0380897	0.947917	0.965909	-0.0179924	0.940476	0.947368	-0.00689223	0.944196	0.956639	-0.0124423	0.938272	0.929293	0.00897868
8	1	0.988372	0.970588	0.0177839	0.959184	0.965517	-0.00633357	0.973778	0.968053	0.00572514	0.839506	0.858974	-0.0194682	0.960526	0.821053	0.139474	0.900016	0.840013	0.0600027	0.965116	0.9375	0.0276163	0.957447	0.917647	0.0397997	0.961282	0.927574	0.033708	0.926316	0.914634	0.0116816	0.952941	0.97	-0.0170588	0.939628	0.942317	-0.00268859	0.916667	0.958763	-0.0420962	0.936842	0.929412	0.00743034	0.926754	0.944087	-0.0173329	0.941176	0.847059	0.0941176
9	1	0.989899	0.977528	0.0123709	0.940476	0.938144	0.00233186	0.965188	0.957836	0.00735138	0.952941	0.94898	0.00396158	0.934783	0.931034	0.00374813	0.943862	0.940007	0.00385486	0.989474	0.933333	0.0561404	0.940476	0.959184	-0.0187075	0.964975	0.946259	0.0187164	0.977011	0.959596	0.0174155	0.959184	0.965517	-0.00633357	0.968098	0.962557	0.00554098	0.989362	0.934066	0.0552958	0.964286	0.928571	0.0357143	0.976824	0.931319	0.045505	0.954023	0.958763	-0.0047399
10	1	0.94382	0.989691	-0.0458705	0.938144	0.965116	-0.0269719	0.940982	0.977404	-0.0364212	0.965909	0.969697	-0.00378788	0.979167	0.94382	0.0353464	0.972538	0.956759	0.0157793	0.988372	0.95	0.0383721	0.978495	0.934066	0.0444287	0.983433	0.942033	0.0414004	0.989796	0.955056	0.0347397	0.977273	0.98	-0.00272727	0.983534	0.967528	0.0160062	0.965909	0.969697	-0.00378788	0.979167	0.94382	0.0353464	0.972538	0.956759	0.0157793	0.979798	0.977528	0.00226989
11	1	0.929412	0.936842	-0.00743034	0.968421	0.955556	0.0128655	0.948916	0.946199	0.00271758	0.946237	0.918605	0.0276319	0.935897	0.87234	0.063557	0.941067	0.895473	0.0455945	0.95122	0.90625	0.0449695	0.877778	0.914634	-0.0368564	0.914499	0.910442	0.00405657	0.969072	0.942529	0.0265434	0.987952	0.930693	0.0572587	0.978512	0.936611	0.0419011	0.977528	0.979798	-0.00226989	0.978495	0.910112	0.0683823	0.978011	0.944955	0.0330562	0.989474	0.921348	0.0681254
12	1	0.957447	0.930233	0.0272143	0.977273	0.990099	-0.0128263	0.96736	0.960166	0.00719398	0.904762	0.933333	-0.0285714	0.894118	0.8625	0.0316176	0.89944	0.897917	0.00152311	0.822785	0.818182	0.00460299	0.837838	0.862069	-0.0242311	0.830311	0.840125	-0.00981407	0.963855	0.918367	0.0454881	0.913978	0.930233	-0.0162541	0.938917	0.9243	0.014617	0.963855	0.939394	0.0244615	0.933333	0.869048	0.0642857	0.948594	0.904221	0.0443736	0.928571	0.935484	-0.00691244
13	1	0.952381	0.938776	0.0136054	0.947917	0.941176	0.0067402	0.950149	0.939976	0.0101728	0.967391	0.922222	0.0451691	0.929412	0.947917	-0.0185049	0.948402	0.935069	0.0133321	0.963855	0.917526	0.0463296	0.955556	0.898876	0.0566792	0.959705	0.908201	0.0515044	0.956989	0.931818	0.0251711	0.903614	0.93617	-0.0325558	0.930302	0.933994	-0.00369234	0.927711	0.938144	-0.0104335	0.959184	0.988889	-0.0297052	0.943447	0.963517	-0.0200694	0.849462	0.938272	-0.0888092
14	1	1	1	0	0.977273	0.98	-0.00272727	0.988636	0.99	-0.00136364	0.942529	0.979592	-0.0370631	0.989796	0.966667	0.0231293	0.966162	0.973129	-0.00696692	0.969388	0.988764	-0.0193763	0.955056	0.989796	-0.0347397	0.962222	0.98928	-0.027058	0.988506	0.980392	0.00811359	0.969388	0.965909	0.00347866	0.978947	0.973151	0.00579613	0.989583	0.967391	0.022192	0.977778	1	-0.0222222	0.983681	0.983696	-1.50966e-05	0.969388	0.988764	-0.0193763
15	1	0.979592	0.977778	0.00181406	0.988889	1	-0.0111111	0.98424	0.988889	-0.00464853	0.965517	0.97	-0.00448276	0.969697	0.988764	-0.0190671	0.967607	0.979382	-0.0117749	1	0.956044	0.043956	0.91954	1	-0.0804598	0.95977	0.978022	-0.0182519	0.977528	1	-0.0224719	0.989899	0.977528	0.0123709	0.983714	0.988764	-0.00505051	0.989691	0.978022	0.0116687	0.988636	0.980198	0.00843834	0.989164	0.97911	0.0100535	0.988506	0.980392	0.00811359
16	2	0.920455	0.882353	0.0381016	0.883721	0.956044	-0.072323	0.902088	0.919198	-0.0171107	0.94382	0.978947	-0.0351271	0.967742	0.920455	0.0472874	0.955781	0.949701	0.00608012	0.967742	0.906977	0.0607652	0.976744	0.938144	0.0385999	0.972243	0.922561	0.0496825	0.925926	0.916667	0.00925926	0.954545	0.873563	0.0809822	0.940236	0.895115	0.0451207	0.922222	0.904762	0.0174603	0.941176	0.9375	0.00367647	0.931699	0.921131	0.0105684	0.884615	0.891304	-0.00668896
17	2	0.929412	0.958333	-0.0289216	0.948454	0.965517	-0.0170636	0.938933	0.961925	-0.0229926	0.945055	0.870588	0.0744667	0.95	0.882979	0.0670213	0.947527	0.876783	0.070744	0.975309	0.89899	0.0763187	0.967742	0.932584	0.0351577	0.971525	0.915787	0.0557382	0.925926	0.916667	0.00925926	0.954545	0.873563	0.0809822	0.940236	0.895115	0.0451207	0.977011	0.94898	0.0280319	0.956989	0.944444	0.0125448	0.967	0.946712	0.0202884	0.96875	0.931818	0.0369318
18	2			0			0				0.923913	0.905882	0.0180307	0.903614	0.936842	-0.0332276				0.903614	0.936842	-0.0332276	0.935484	0.943182	-0.00769795				0.958333	0.930233	0.0281008	0.903614	0.947368	-0.043754				0.927711	0.936842	-0.00913126	0.954023	0.852273	0.10175				0.925532	0.929412	-0.00387985
19	2	0.978261	0.909091	0.06917	0.964706	0.916667	0.0480392	0.971483	0.912879	0.0586046	0.952941	0.904255	0.0486859	0.957447	0.954545	0.00290135	0.955194	0.9294	0.0257936	0.925532	0.953488	-0.0279565	0.941176	0.947917	-0.0067402	0.933354	0.950703	-0.0173483	0.950617	0.90625	0.0443673	0.977528	0.850575	0.126953	0.964073	0.878412	0.0856603	0.9	0.903614	-0.00361446	0.916667	0.902174	0.0144928	0.908333	0.902894	0.00543915	0.903614	0.89011	0.0135046
20	2	0.988372	0.970588	0.0177839	0.989796	0.966667	0.0231293	0.989084	0.968627	0.0204566	0.989583	0.956044	0.0335394	0.976471	0.96	0.0164706	0.983027	0.958022	0.025005	0.965517	0.98	-0.0144828	0.979592	0.989011	-0.00941915	0.972555	0.984505	-0.011951	0.989899	1	-0.010101	0.977273	0.98	-0.00272727	0.983586	0.99	-0.00641414	1	0.990291	0.00970874	1	0.989011	0.010989	1	0.989651	0.0103489	0.979381	0.955056	0.0243253
21	2	0.913978	0.902439	0.0115395	0.938272	0.927083	0.0111883	0.926125	0.914761	0.0113639	0.907895	0.833333	0.0745614	0.956044	0.869048	0.0869963	0.931969	0.85119	0.0807789	0.887324	0.77381	0.113514	0.926829	0.885057	0.0417718	0.907077	0.829433	0.0776431	0.963855	0.929293	0.0345625	0.93617	0.901235	0.0349356	0.950013	0.915264	0.0347491	0.969072	0.966292	0.00278003	0.965116	0.9375	0.0276163	0.967094	0.951896	0.0151982	0.935065	0.895833	0.0392316
22	2	0.895833	0.950617	-0.054784	0.875	0.913043	-0.0380435	0.885417	0.93183	-0.0464137	0.907895	0.870968	0.036927	0.894118	0.857143	0.0369748	0.901006	0.864055	0.0369509	0.931818	0.886364	0.0454545	0.911392	0.88172	0.029672	0.921605	0.884042	0.0375633	0.97619	0.960784	0.0154062	0.967391	0.896552	0.0708396	0.971791	0.928668	0.0431229	0.956522	0.920455	0.0360672	0.9125	0.882979	0.0295213	0.934511	0.901717	0.0327942	0.950617	0.886598	0.0640193
23	2	0.988506	0.96	0.0285057	0.989691	0.967033	0.0226578	0.989098	0.963516	0.0255818	0.969072	0.942529	0.0265434	0.917647	0.957895	-0.0402477	0.94336	0.950212	-0.00685212	0.941176	0.948454	-0.00727714	0.968421	0.906977	0.0614443	0.954799	0.927715	0.0270836	0.979381	0.955056	0.0243253	0.965517	0.990099	-0.0245818	0.972449	0.972578	-0.000128252	0.977011	0.980198	-0.00318653	0.946809	0.955056	-0.00824767	0.96191	0.967627	-0.0057171	0.978495	0.934066	0.0444287
24	2	0.945652	0.931818	0.013834	0.964706	0.94898	0.0157263	0.955179	0.940399	0.0147801	0.902439	0.9375	-0.035061	0.967742	0.921348	0.0463936	0.93509	0.929424	0.00566632	0.917526	0.925926	-0.00840015	0.962963	0.92	0.042963	0.940244	0.922963	0.0172814	0.987952	0.908163	0.0797885	1	0.933333	0.0666667	0.993976	0.920748	0.0732276	0.938144	0.965116	-0.0269719	0.953488	0.948454	0.00503476	0.945816	0.956785	-0.0109686	0.927711	0.915789	0.0119214
25	2	0.966292	1	-0.0337079	0.989899	0.989011	0.000888001	0.978096	0.994505	-0.0164099	0.989796	0.966667	0.0231293	0.988235	0.95	0.0382353	0.989016	0.958333	0.0306823	0.964706	0.938776	0.0259304	0.989691	0.967033	0.0226578	0.977198	0.952904	0.0242941	0.988889	0.860465	0.128424	0.97561	0.919192	0.0564178	0.982249	0.889829	0.0924208	0.966292	0.989899	-0.0236069	0.957447	0.943182	0.014265	0.961869	0.96654	-0.00467093	0.989796	0.977528	0.0122678
[truncated: 228 more columns]

## Sheet: Diff Baseline
Sujets	Groupe	DIFFControle2TPCSCTR	DIFFControle2TPLSCTR	DIFFControle2SCTR	DIFFControle3TPCSCTR	DIFFControle3TPLSCTR	DIFFControle3SCTR	DIFFManip2TPCSCTR	DIFFManip2TPLSCTR	DIFFManip2SCTR	DIFFManip3TPCSCTR	DIFFManip3TPLSCTR	DIFFManip3SCTR	DIFFControle2TPCSCRC	DIFFControle2TPLSCRC	DIFFControle2SCRC	DIFFControle3TPCSCRC	DIFFControle3TPLSCRC	DIFFControle3SCRC	DIFFcontrolemean	DIFFManip2TPCSCRC	DIFFManip2TPLSCRC	DIFFManip2SCRC	DIFFManip3TPCSCRC	DIFFManip3TPLSCRC	DIFFManip3SCRC	DIFFManipSCRC	Sujet ID	2_KSS-VEILLE	3_KSS-VEILLE	2_KSS-SIESTE	3_KSS-SIESTE	2_GV-VEILLE	3_GV-VEILLE	2_GV-SIESTE	3_GV-SIESTE	2_GA-VEILLE	3_GA-VEILLE	2_GA-SIESTE	3_GA-SIESTE	2_VAS9-VEILLE	3_VAS9-VEILLE	2_VAS9-SIESTE	3_VAS9-SIESTE	2_VAS-S1-VEILLE	3_VAS-S1-VEILLE	2_VAS-S1-SIESTE	3_VAS-S1-SIESTE	2VAS-S1
1	1	-68.146	44.0138	-12.0661	-48.3937	43.7646	-2.31455	39.9354	-0.045687	19.9449	0.744328	0.905719	0.825023	10.1828	13.8568	12.0198	-1.40686	4.33009	1.46161	6.74069	-5.95952	1.98338	-1.98807	-3.15516	-2.6721	-2.91363	-2.45085	S1	1	2	0	2	0	-3.21429	0.238095	-1.66667	-0.238095	0.238095	-0.238095	0.119048	-0.595238	-0.595238	0.119048	-0.238095	0.425532	0.319149	0	0.851064	0.212766
2	1	-11.6902	-9.45433	-10.5723	14.6274	-11.1544	1.73646	46.2252	-40.8739	2.67565	16.2137	-43.4269	-13.6066	-2.12398	-2.06872	-2.09635	-3.13227	-4.27695	-3.70461	-2.90048	-3.14883	-0.086577	-1.6177	1.17588	3.9013	2.53859	0.460444	S2	2	2	1	2	-3.69048	-3.80952	-8.21429	-10	-0.238095	-9.76191	-10	-1.19048	0.357143	-0.119048	-2.02381	-2.38095	0.744681	0.319149	2.65957	2.76596	1.70213
3	1	4.27108	-144.194	-69.9614	-23.2236	-3.58333	-13.4035	-37.3397	-132.817	-85.0782	55.452	40.0873	47.7697	8.07467	3.61908	5.84688	7.13975	10.3196	8.72967	7.28827	-7.36574	-3.81046	-5.5881	-2.49636	-5.37865	-3.9375	-4.7628	S3	1	2	1	2	-7.97619	-12.9762	-5.47619	-11.131	-0.238095	-1.19048	-3.75	-6.19048	-2.61905	-1.78571	-2.26191	-2.73809	1.59574	2.97872	1.59574	2.18085	1.59574
4	1	14.3213	36.8321	25.5767	19.1811	-47.7549	-14.2869	-49.2453	-66.6661	-57.9557	-49.3258	-62.184	-55.7549	-2.1279	2.08213	-0.022886	2.03916	4.30058	3.16987	1.57349	-0.306874	-8.42643	-4.36665	-0.884191	-3.60419	-2.24419	-3.30542	S4	0	-1	0	0	1.42857	-1.78571	-0.357143	0.952381	-0.357143	0.238095	4.28571	5.2381	-0.952381	-0.357143	1.07143	0.238095	-0.851064	3.61702	0.212766	-0.744681	-0.319149
5	1	-20.3012	-21.8481	-21.0747	20.1725	21.3212	20.7469	-29.647	-18.8381	-24.2425	-10.817	12.2766	0.729779	-0.74889	4.70588	1.9785	-3.1375	5.72829	1.29539	1.63695	1.96102	5.69048	3.82575	-1.31066	1.3044	-0.003128	1.91131	S5	-2	-1	0	0	1.54762	-0.357143	3.57143	1.90476	1.19048	1.42857	1.19048	0.595238	0.119048	-0.47619	0.119048	0.238095	-1.38298	-0.319149	-0.851064	-0.212766	-1.11702
6	1	-0.297501	-8.55185	-4.42468	13.5623	26.7506	20.1565	9.84645	-0.809907	4.51827	-6.45891	-9.27069	-7.8648	-11.4424	10.4372	-0.502574	-9.57432	6.05976	-1.75728	-1.12993	1.19014	0.869281	1.02971	-0.159033	2.39353	1.11725	1.07348	S6	3	1	-2	0	-3.92857	-0.238095	2.85714	-0.357143	0.119048	0.833333	0.833333	1.30952	-0.357143	-0.119048	0.119048	-0.238095	-0.425532	-0.851064	-0.744681	1.06383	-0.585106
7	1	-46.9547	-60.0504	-53.5026	-45.7021	23.7644	-10.9689	51.3337	-92.5644	-20.6154	40.4098	40.0897	40.2498	6.05916	-0.595644	2.73176	4.1867	2.05534	3.12102	2.92639	-3.44759	-6.65882	-5.05321	-0.750484	4.61311	1.93131	-1.56095	S7	3	3	2	3	-14.5238	-6.07143	-6.78571	-9.76191	0.952381	-0.357143	0.119048	-0.238095	-0.714286	1.30952	-1.30952	-1.90476	3.7234	5.31915	-0.212766	1.70213	1.75532
8	1	56.5734	81.8423	69.2079	47.7142	13.9654	30.8398	93.9365	-43.774	25.0813	77.716	-64.0924	6.81181	-3.7252	14.5807	5.42776	0.983242	4.61333	2.79829	4.11302	-5.37779	2.44892	-1.46443	8.2436	4.29892	6.27126	2.40341	S8	0	-1	-1	-1	5.83333	-0.714286	7.61905	9.40476	0.833333	0.833333	-7.14286	-7.7381	0	-0.47619	0.357143	0.238095	0.106383	1.70213	1.80851	1.80851	0.957447
9	1	-62.8337	-19.5321	-41.1829	-27.3239	66.8322	19.7541	-19.4237	115.005	47.7904	71.7978	47.5382	59.668	-0.840932	0.141627	-0.349653	4.37695	-2.10393	1.13651	0.393426	3.78802	4.20479	3.9964	-2.21554	4.10558	0.945018	2.47071	S9	-1	0	0	1	2.26191	-2.61905	-1.90476	-6.19048	-1.42857	-0.238095	1.07143	-0.714286	0	-0.119048	0.47619	-0.119048	0.106383	2.55319	-0.425532	2.55319	-0.159574
11	1	-181.263	282.834	50.7854	-153.424	59.2874	-47.0684	-81.5145	104.331	11.4084	-91.8606	8.24852	-41.806	3.50623	5.06915	4.28769	5.23998	-4.97219	0.133899	2.21079	-2.88133	1.11235	-0.88449	4.15819	-3.905	0.126596	-0.378947	S11	-3	-1	0	2	9.16667	1.90476	-0.833333	-6.19048	0.833333	-2.73809	0.714286	-0.595238	1.07143	-0.714286	-1.54762	-0.357143	-3.0303	0.606061	-0.20202	0.808081	-1.61616
13	1	22.3933	-19.1098	1.64173	-35.1569	-29.8366	-32.4967	-8.04782	0.332564	-3.85763	7.81716	22.9804	15.3988	3.15636	-2.52451	0.315927	3.27242	4.9939	4.13316	2.22454	-3.56046	0.285054	-1.6377	-11.398	5.41219	-2.99292	-2.31531	S13	2	-2	-2	0	-5.54217	10.241	12.4096	5.30121	-1.80723	4.21687	3.13253	1.92771	-0.361446	0.963855	2.40964	1.68675	1.35417	0.9375	-0.520833	0.729167	0.416667
14	1	17.8524	12.2674	15.0599	28.442	16.0335	22.2377	-24.9328	-15.391	-20.1619	-27.8906	-6.2561	-17.0734	-3.70631	2.58565	-0.560329	-1.93763	-3.20125	-2.56944	-1.56488	1.40784	-2.57009	-0.581122	-2.74899	-3.82184	-3.28541	-1.93327	S14	0	0	-2	-2	1.66667	4.28571	8.92857	7.02381	1.90476	-0.833333	-2.26191	-0.357143	0.714286	0.357143	1.07143	0.238095	-1.14583	-1.04167	-0.833333	-0.9375	-0.989583
15	1	-99.5181	-74.0377	-86.7779	14.6464	-7.1882	3.72909	-38.2693	36.5216	-0.873841	2.94903	-12.0686	-4.55979	-0.629682	-0.795596	-0.712639	4.2142	-6.93487	-1.36033	-1.03649	3.41406	-0.393256	1.5104	3.05855	2.29826	2.67841	2.09441	S15	1	1	0	0	-3.25301	-2.16867	0.120482	0.843373	0.843373	2.6506	1.56627	3.13253	0.361446	0.361446	-0.60241	-0.240964	0.9375	1.25	0.3125	0.520833	0.625
16	2	51.6818	-133.737	-41.0278	19.6752	64.3568	42.016	-40.4951	-84.4875	-62.4913	48.0267	31.4195	39.7231	-7.32287	11.961	2.31908	2.26636	11.0923	6.67932	4.4992	0.820106	-7.73058	-3.45524	-1.59482	-4.30757	-2.95119	-3.20322	L1	0	2	2	3	-0.357143	-4.16667	-6.14458	-10.8434	-3.33333	0.119048	2.16867	0.120482	-1.42857	-0.238095	-2.28916	-2.6506	0.208333	1.35417	1.66667	2.29167	0.9375
17	2	-89.1643	-45.6646	-67.4144	-92.5661	-66.071	-79.3186	-53.4344	-60.1039	-56.7692	36.3196	-57.7458	-10.7131	10.3388	8.40849	9.37366	10.524	5.22213	7.87308	8.62337	1.87726	-6.84374	-2.48324	2.76726	-8.94416	-3.08845	-2.78585	L2	-2	-2	2	0	4.09639	12.2892	-8.57143	-0.714286	-9.27711	-6.26506	9.28571	9.28571	0	0.595238	-0.843373	-0.60241	-1.77083	-1.77083	4.0625	0.729167	1.14583
19	2	-164.452	154.192	-5.13031	-25.655	-68.1291	-46.8921	-309.294	-138.76	-224.027	-85.4917	288.851	101.68	-2.04841	-4.51379	-3.2811	-9.71264	-5.47794	-7.59529	-5.4382	-4.79817	-11.2461	-8.02212	-3.08627	-4.42367	-3.75497	-5.88854	L4	-1	-1	0	2	-10.9639	6.38554	-3.57143	-11.3095	-3.37349	-0.722892	-0.833333	-11.1905	-2.26191	0.238095	-0.481928	-3.01205	0.9375	-1.35417	0.520833	1.97917	0.729167
20	2	159.614	-137.404	11.1053	29.1845	-10.1794	9.50253	-87.8331	-7.67043	-47.7517	-97.8293	-23.221	-60.5252	1.57555	-0.665866	0.454843	-3.22666	-3.25484	-3.24075	-1.39295	1.98097	1.37163	1.6763	3.44263	-4.17172	-0.364545	0.655878	L5	1	2	1	2	-8.92857	-6.78571	-1.68675	-4.69879	0.357143	-8.57143	0.120482	-1.08434	-2.14286	-1.78571	-0.361446	-1.56627	0.833333	2.1875	0.208333	1.14583	0.520833
21	2	24.1703	-76.0628	-25.9463	-126.649	-205.597	-166.123	-36.4009	-47.0653	-41.7331	17.0102	-44.8159	-13.9028	6.30219	7.58081	6.9415	10.1975	3.05835	6.62792	6.78471	-3.17825	-0.731937	-1.95509	0.466911	7.49128	3.9791	1.012	L6	0	0	-2	-4	-0.963855	0.722892	9.88095	7.2619	-3.61446	-3.61446	3.69048	1.78571	-0.595238	0.119048	1.80723	-0.60241	1.25	-0.520833	-1.45833	-1.66667	-0.104167
22	2	4.43161	-58.443	-27.0057	60.0745	-9.63528	25.2196	-22.7552	-44.4423	-33.5987	35.6921	-18.897	8.39755	9.17109	7.50183	8.33646	10.0238	6.77154	8.3977	8.36708	2.0661	-4.13183	-1.03286	4.86132	-1.14526	1.85803	0.412583	L7	2	2	0	-1	-4.04762	-5.59524	-20.7229	-6.62651	0.119048	-0.714286	-8.55422	0.120482	0	-0.119048	-1.92771	-2.40964	5.52083	5.20833	3.02083	-0.625	4.27083
23	2	-40.083	-3.34032	-21.7117	21.4463	43.6146	32.5304	28.1423	26.363	27.2526	34.9373	47.7746	41.356	-0.196232	-6.29054	-3.24339	-3.57829	3.87866	0.150183	-1.5466	-2.75118	1.63341	-0.558884	2.01034	0.699535	1.35494	0.398027	L8	2	0	0	-2	-4.33735	-2.53012	-1.42857	5.35714	5.42169	2.04819	-1.78571	-2.5	0.714286	0.238095	1.3253	1.08434	1.97917	0.520833	2.29167	1.77083	2.13542
24	2	-133.77	49.6244	-42.0726	-185.477	135.486	-24.9954	-419.991	-117.903	-268.947	-197.034	-139.214	-168.124	-4.8895	3.06673	-0.911382	-2.22341	2.72367	0.250126	-0.330628	-10.676	-6.16319	-8.41962	-6.78672	-3.79029	-5.2885	-6.85406	L9	2	1	2	0	-3.92857	-9.04762	-5.30121	-4.09639	-2.97619	-2.38095	4.33735	4.09639	1.19048	1.66667	0.120482	0.843373	3.4375	3.95833	0.3125	0.104167	1.875
25	2	174.201	68.8468	121.524	-13.7184	-137.062	-75.39	-107.744	-74.0614	-90.9026	-66.6753	72.3558	2.84025	5.68371	3.73473	4.70922	5.96382	2.17698	4.0704	4.38981	-15.2031	-4.21528	-9.70917	-11.6156	-3.70004	-7.65782	-8.68349	L10	0	0	0	0	-0.60241	-3.25301	13.9286	9.40476	1.56627	1.56627	6.30952	2.97619	0.833333	0.595238	1.20482	-1.56627	-0.104167	0.625	-3.95833	-3.54167	-2.03125
[truncated: 143 more columns]
